# Supplementary material
Source: publisher site journal article supplement (https://www.spandidos-publications.com/792/downloadSupplementary)

Figure S1. Effects of PI3K and ERK inhibitors on cell viability after PAP treatment. MTT assay of 100 mg/l PAP treated MC3T3-E1 with or without 10  $\mu$ M LY or 20  $\mu$ M PD after 7 days. Data are presented as mean  $\pm$  SD. \* $P$ <0.05 vs. control group. LY, LY294002; PD, PD98059; PAP, pilose antler peptide; Ctrl, control; OD, optical density.

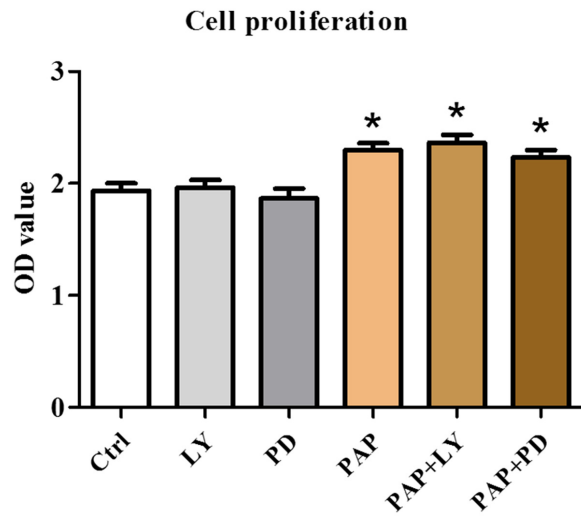

Supplement: Supplementary file 1 [file downloadSupplementary]
